# Supplementary material for: Prevalence, Timing, and Network Localization of Emergent Visual Creativity in Frontotemporal Dementia
Source: PubMed Central journal article supplement (PMC9972248; doi:10.1001/jamaneurol.2023.0001), 2023-02-27
Supplement: jamaneurol-e230001-s002.pdf [file jamaneurol-e230001-s002.pdf]

## Data Sharing Statement

Friedberg. Association of Emergent Visual Creativity in Frontotemporal Dementia With Brain Structure and Function. *JAMA Neurol*. Published February 27, 2023.

doi:10.1001/jamaneurol.2023.0001

### Data

**Data available:** No

### Additional Information

**Explanation for why data not available:** The datasets presented in this article are not readily available because of ethical and privacy restrictions. Requests to access the datasets should be directed to the corresponding author.
